# Supplementary material for: N-, P-, and O-doped porous carbon as advanced trifunctional metal-free electrocatalysts
Source: Royal Society of Chemistry journal article supplement (doi:10.1039/d2cy01789j), 2022-12-14
Supplement: d2cy01789j1.pdf [file d2cy01789j1.pdf]

## Supporting Information

### **N-, P-, and O-doped porous carbon as advanced trifunctional metal-free electrocatalysts**

*Yanan zhang, Lulu Chen, Liqiang Hou\*, Xien Liu\**

State Key Laboratory Base of Eco-Chemical Engineering, College of Chemical Engineering,  
Qingdao University of Science and Technology, Qingdao 266042 (China)

\* Corresponding authors: L Hou, houliqiang@qust.edu.cn; X. Liu, liuxien@qust.edu.cn

This file contains:

Details of calculation sections

Number of pages: 16

Number of Figures: 14

### 1. Calculation of electron transfer number (n) and % HO<sub>2</sub><sup>-</sup> for oxygen reduction reaction:

The electron transfer numbers (n) per O<sub>2</sub> involved in ORR were calculated from the slopes of the Koutecky-Levich plots according to the following equations:

$$\frac{1}{j} = \frac{1}{j_k} + \frac{1}{j_l} = \frac{1}{B\omega^{1/2}} + \frac{1}{j_k}$$

Where  $j$  is the measured current density,  $j_k$  and  $j_l$  are the kinetic and diffusion-limiting current densities,  $\omega$  is the rotating rate of electrode (rpm).  $B$  is determined from the slope of the Koutecky-Levich plots according to the following Levich equation.

$$B = 0.2nFC_{O_2}D_{O_2}^{2/3}\nu^{-1/6}$$

Where  $n$  is electron transfer number per oxygen molecule,  $F$  is Faraday constant (96485 C mol<sup>-1</sup>),  $C_{O_2}$  is the bulk concentration of O<sub>2</sub> ( $7.8 \times 10^{-7}$  mol cm<sup>-3</sup>),  $\nu$  is the kinetic viscosity of electrolyte (0.01 cm<sup>2</sup> S<sup>-1</sup>).  $D_{O_2}$  is the diffusion coefficient of O<sub>2</sub> in 0.1 M KOH ( $1.8 \times 10^{-5}$  cm<sup>2</sup> S<sup>-1</sup>).

Hydrogen peroxide yields and the electron transfer number (n) were calculated by the following equations:

$$\%(HO_2^-) = 200 \times \frac{\frac{I_r}{N}}{I_d + \frac{I_r}{N}}$$

$$n = 4 \times \frac{I_d}{I_d + \frac{I_r}{N}}$$

Where  $I_d$  is disk current,  $I_r$  is ring current, the collection efficiency (N) was determined to be 0.40 by using 10 mM K<sub>3</sub>[Fe(CN)<sub>6</sub>].

Citing: *J. Am. Chem. Soc.* 2012, 134, 3517.

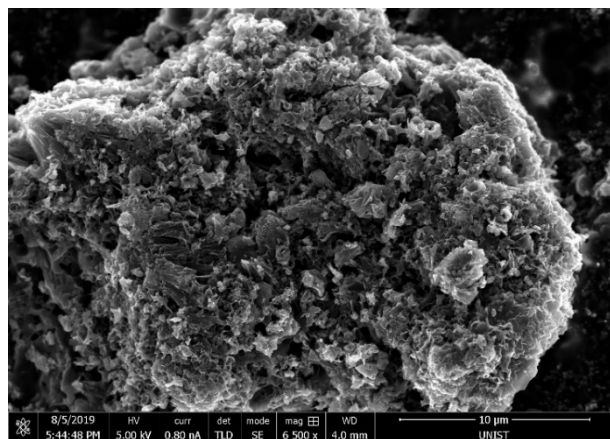

**Figure S1** SEM image of NPOCs.

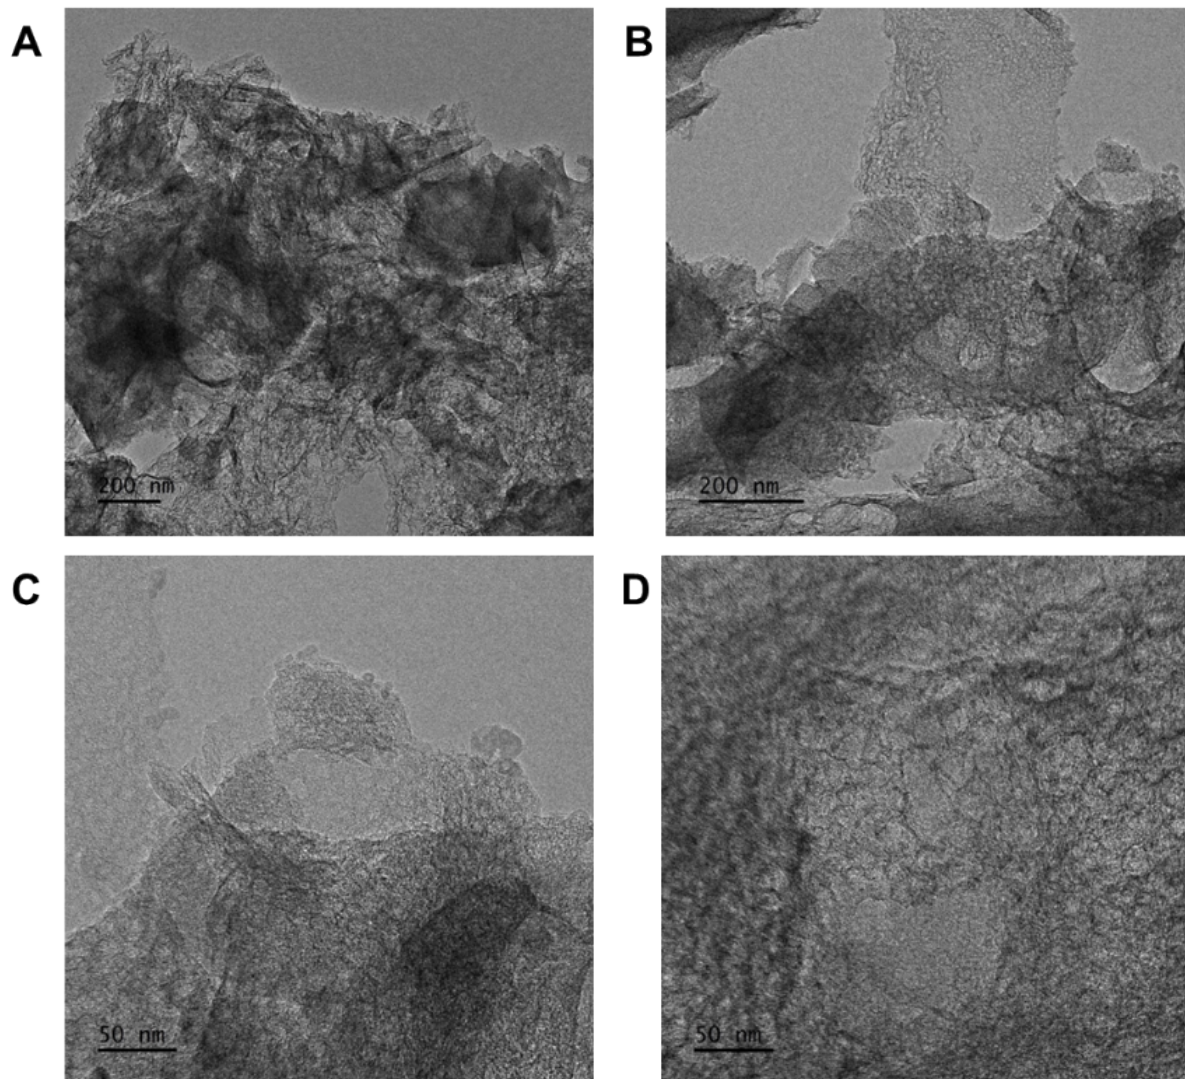

**Figure S2** TEM images of NPOCs

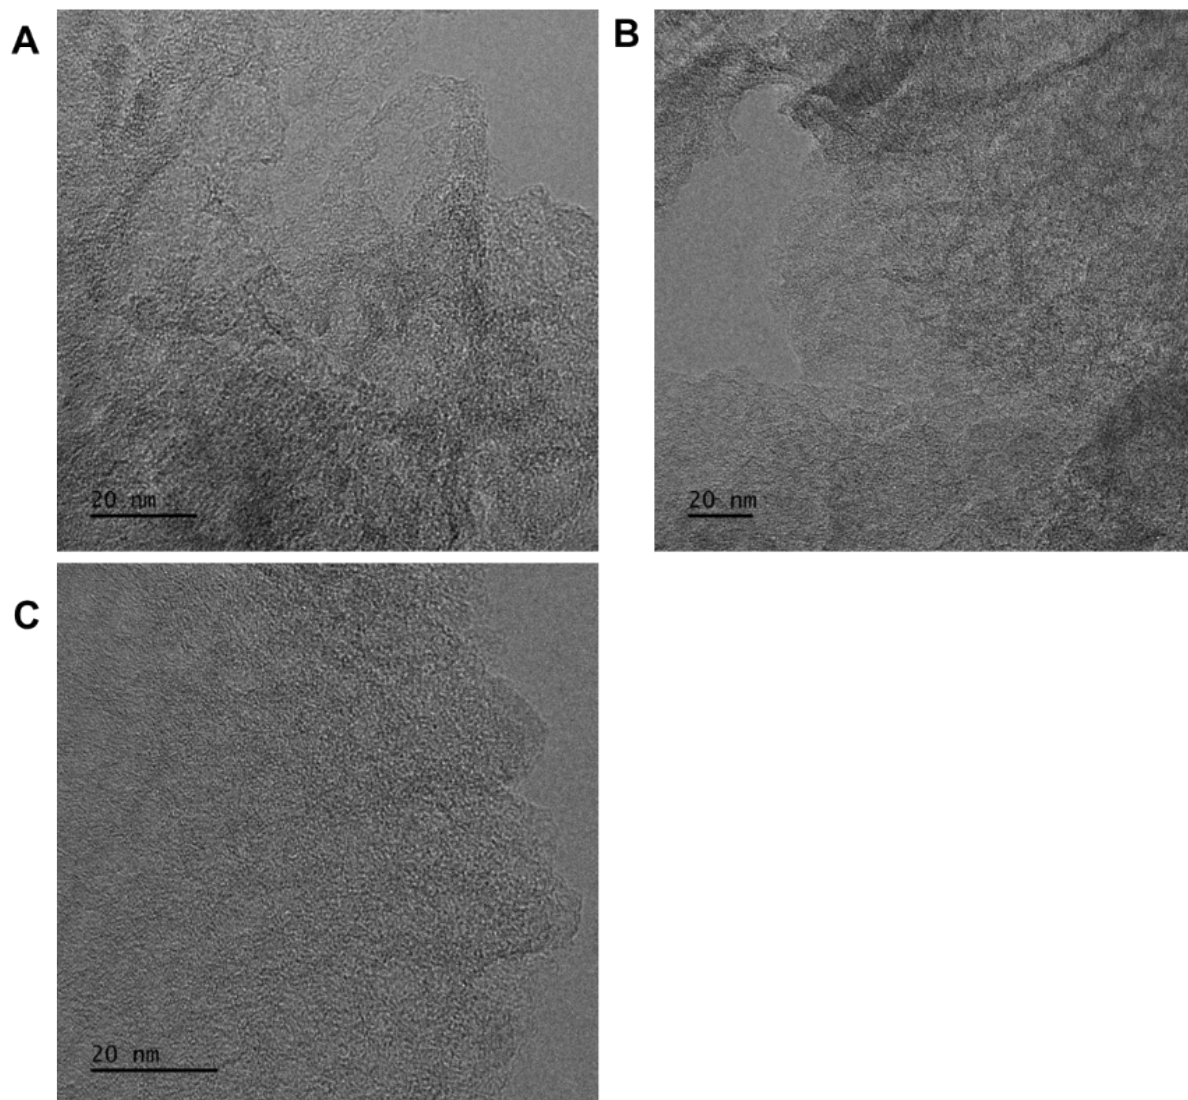

**Figure S3** HRTEM images of NPOCs.

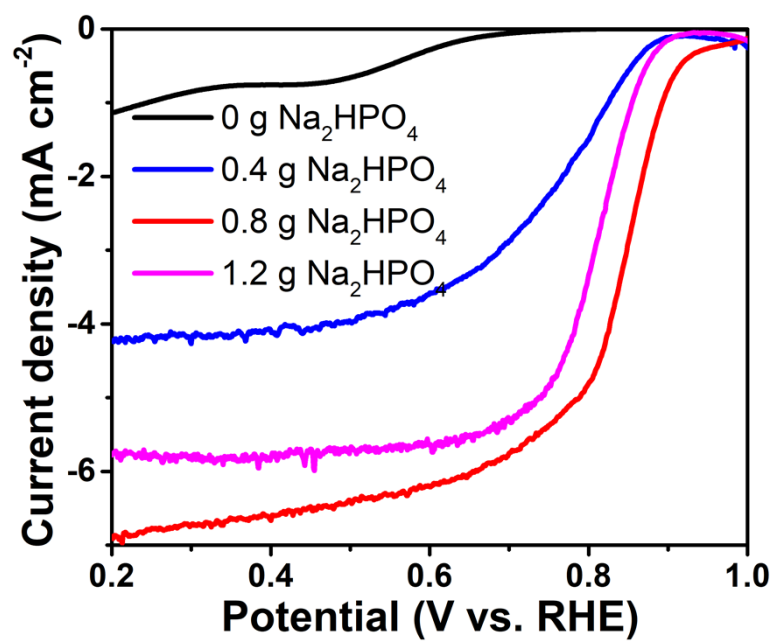

**Figure S4** The effect of the additive amount of phosphorus source on ORR activity.

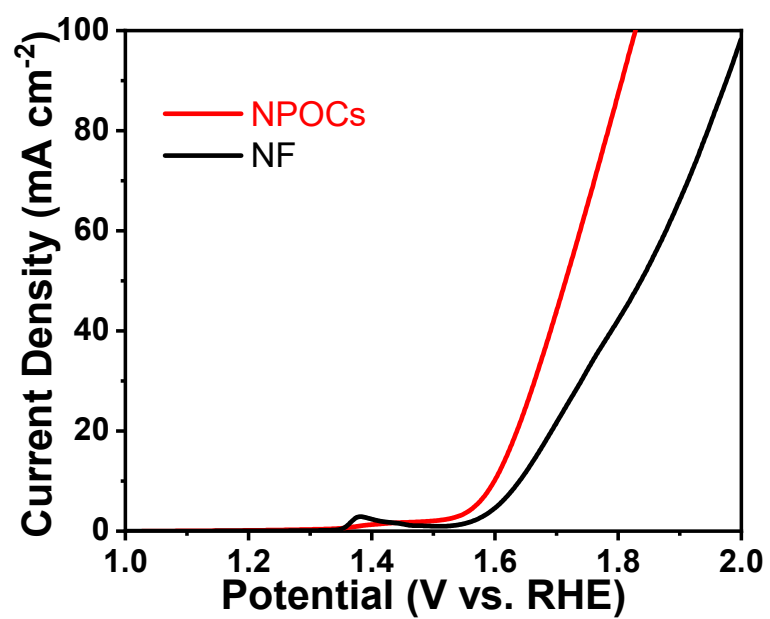

**Figure S5** The comparison between blank NF and NPOCs of OER activity.

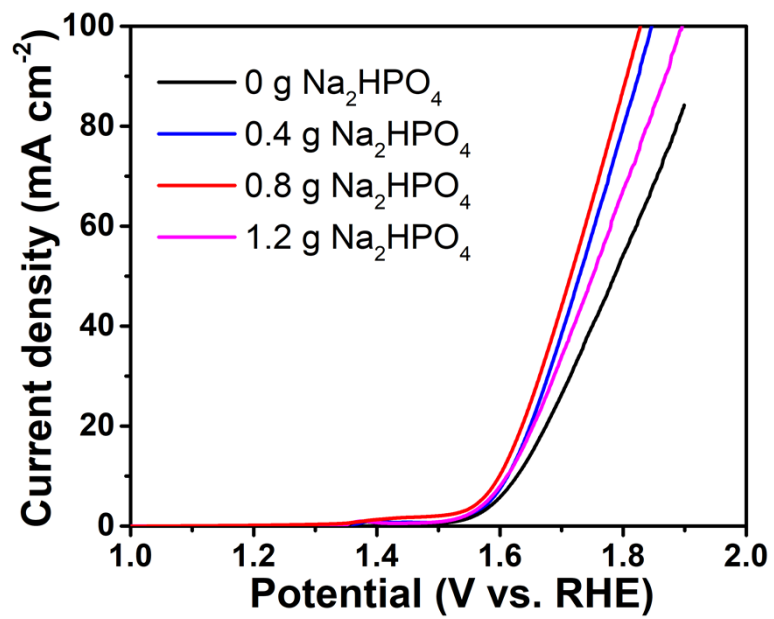

**Figure S6** The effect of the additive amount of phosphorus source on OER activity.



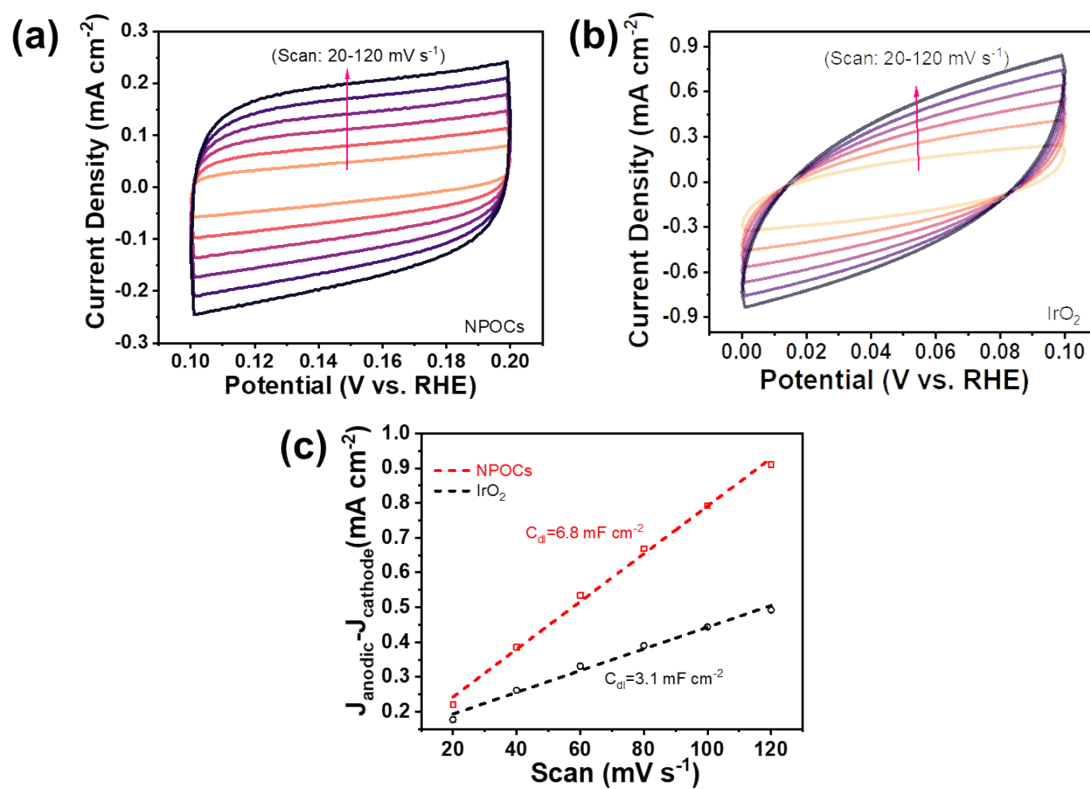

**Figure S7** The CV curves recorded at different scan rates for (a) NPOCs, (b) Commercial IrO<sub>2</sub>. (c) Double-layer capacitance (C<sub>dl</sub>).

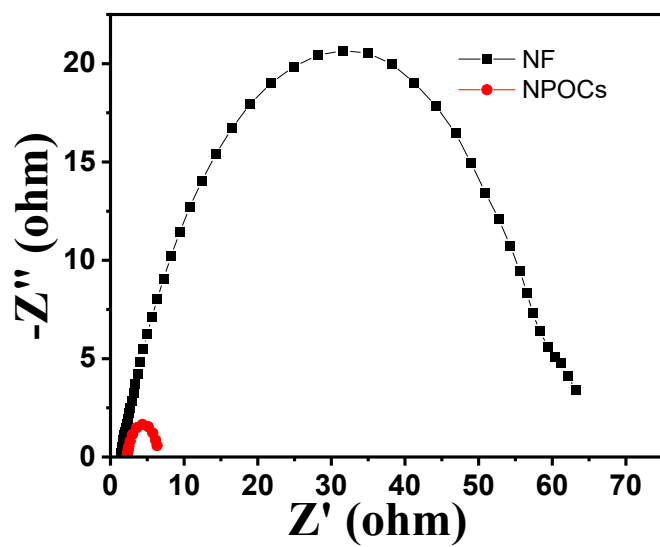

Figure S8 Nyquist plots of blank NF and NPOCs.

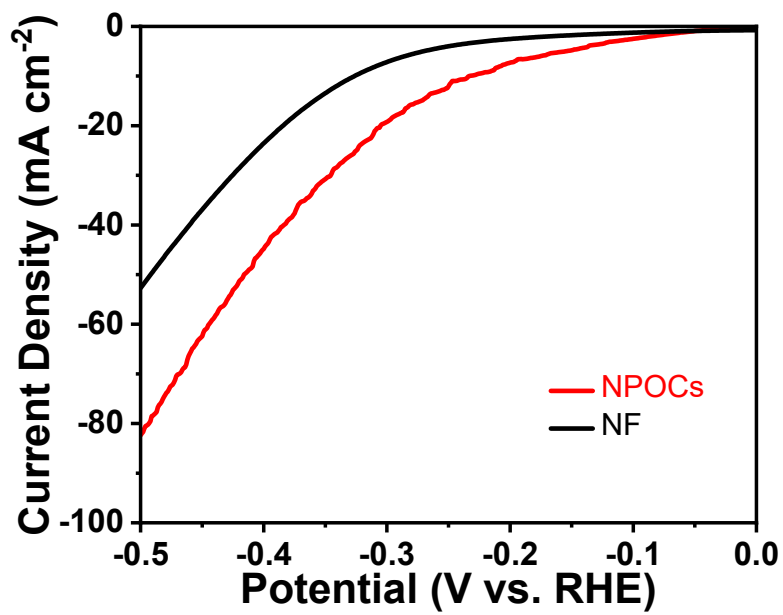

**Figure S9** The comparison between blank NF and NPOCs of HER activity.

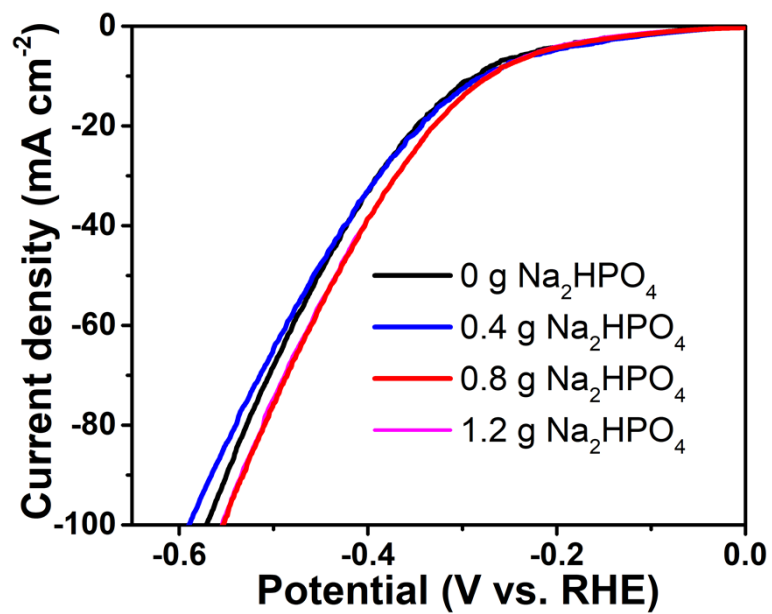

**Figure S10** The effect of the additive amount of phosphorus source on HER activity.

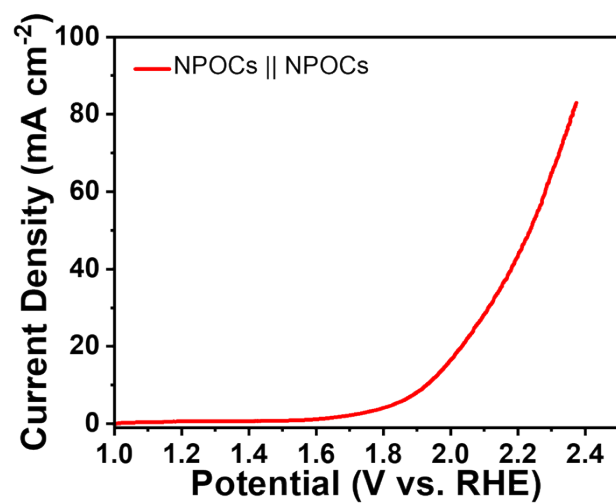

**Figure S11** Overall catalytic water splitting activity of NPOCs in 1 M KOH.

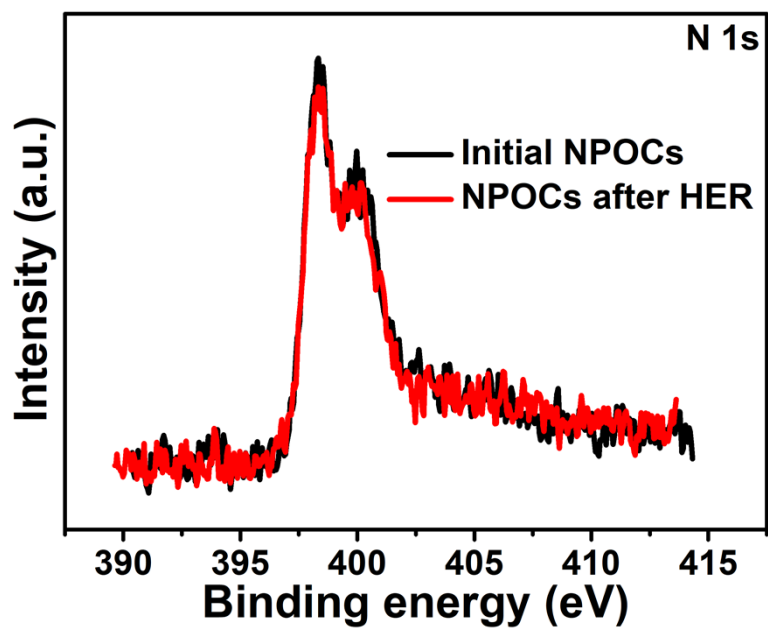

**Figure S12** The comparison of N 1s between initial NPOCs and NPOCs after HER.

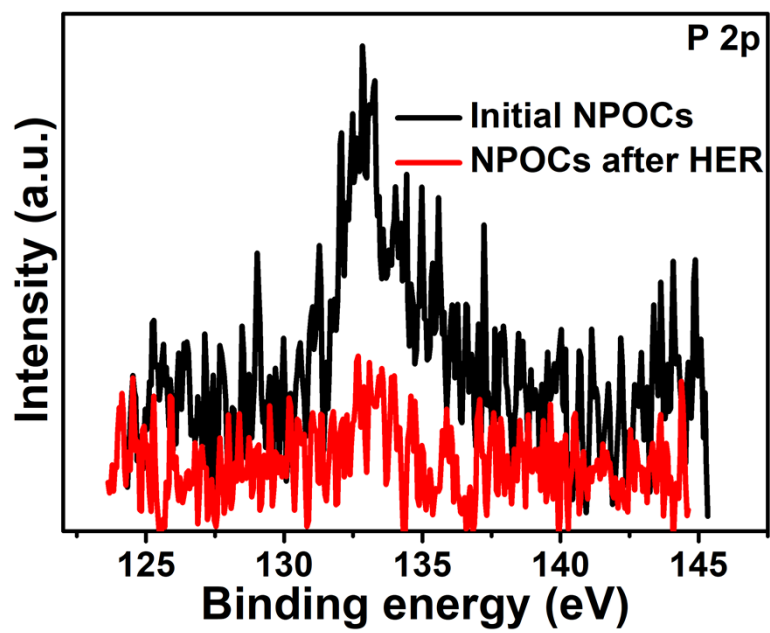

**Figure S13** The comparison of P 2p between initial NPOCs and NPOCs after HER.

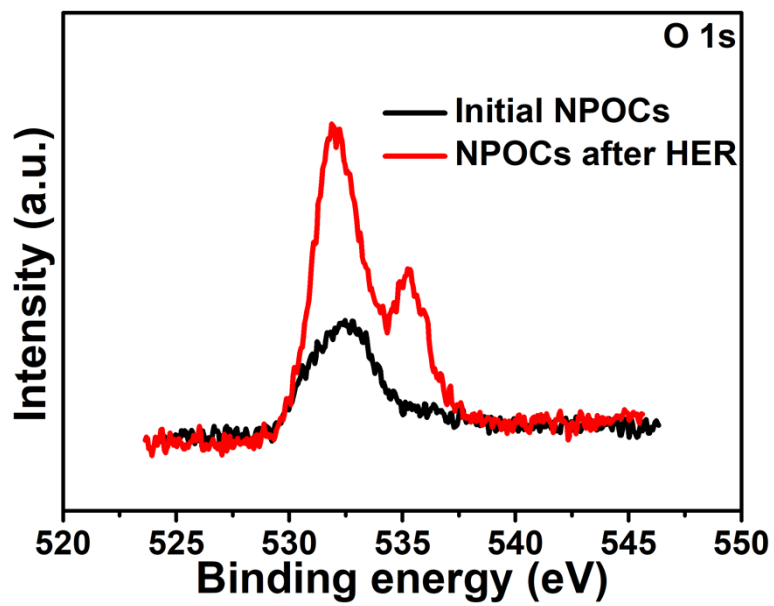

**Figure S14** The comparison of O 1s between initial NPOCs and NPOCs after HER.
